# Supplementary material for: Influence of poly(lactide) stereocomplexes as nucleating agents on the crystallization behavior of poly(lactide)s
Source: Royal Society of Chemistry journal article supplement (doi:10.1039/c8ra09856e), 2019-01-01
Supplement: c8ra09856e1.pdf [file c8ra09856e1.pdf]

## Supporting information

# Influence of poly(lactide) stereocomplexes as nucleating agents on the crystallization behaviors of poly(lactide)s

Nuo Ji, Guang Hu, Jianbo Li and Jie Ren\*

Institute of Nano and Bio-Polymeric Materials, Key Laboratory of Advanced Civil  
Engineering Materials (Tongji University), Ministry of Education, School of  
Material Science and Engineering, Tongji University, Shanghai 201804, China.

### Contents

- 1. FTIR/ATR spectra of PDLA, 4aPDLA, scPLA and 4ascPLA.**
- 2. POM images during non-isothermal crystallization.**
- 3. Relative crystallinity as a function of time for the (a) PDLA-scPLA<sub>x</sub>,  
(b) PDLA-4ascPLA<sub>x</sub>, (c) PLLA-scPLA<sub>x</sub>, and (d) PLLA-4ascPLA<sub>x</sub>  
samples during isothermal crystallization at 110°C.**
- 4. Relative crystallinity as a function of time for the (a) PDLA-scPLA10%, (b)  
PLLA-scPLA10%, (c) PDLA-4ascPLA10%, and (d) PLLA-4ascPLA10%  
samples during isothermal crystallization at various temperatures.**
- 5. Values of  $t_{1/2}$  and crystallization kinetic parameters for PLA/NA samples with various**

nucleating agent contents at  $T_{iso} = 110^{\circ}\text{C}$ .

6. Values of  $t_{1/2}$  and crystallization kinetic parameters for PLA-NA10% samples at various  $T_{iso}$  values.

7. POM images obtained during the isothermal crystallization of (a) PLLA-scPLA6% and (b) PLLA-4ascPLA6% at various temperatures.

1. FTIR/ATR spectra of PDLA, 4aPDLA, scPLA and 4ascPLA.

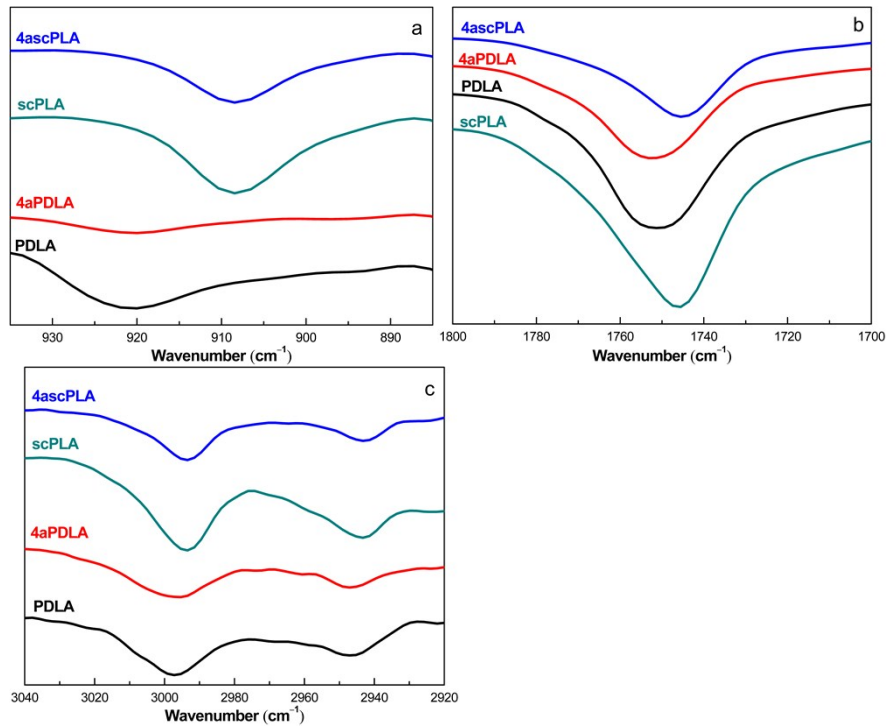

**Figure S1.** FTIR spectra of the homocrystal and stereocomplex specimens in the range of (a)  $935\text{--}885\text{ cm}^{-1}$ , (b)  $1800\text{--}1700\text{ cm}^{-1}$ , and (c)  $3040\text{--}2920\text{ cm}^{-1}$ .

2. POM images during non-isothermal crystallization.

Samples compressed between two slides were heated at 200°C for 5 min to remove the thermal history. Photomicrographs were then obtained while cooling to room temperature at a rate of 20°C·min<sup>-1</sup>. Photomicrographs obtained at various temperatures (150°C, 140°C, 130°C, and 120°C) are presented in Fig. 5. The results revealed the formation of small spherulitic crystallites in the PLLA-NA specimens at 150°C.

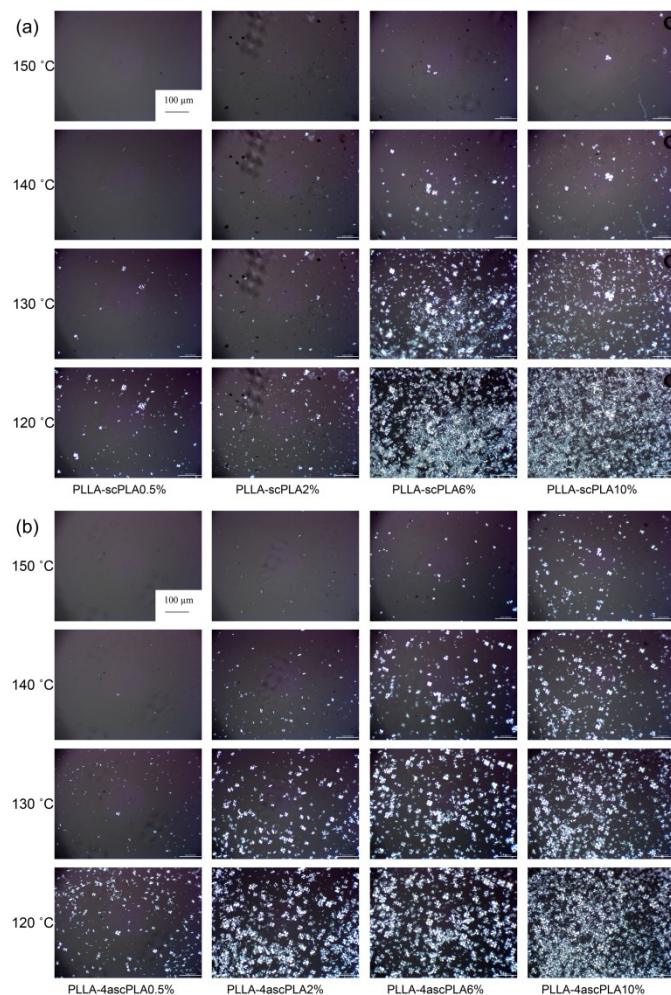

**Figure S2.** POM images during the non-isothermal crystallization of (a) PLLA-scPLA<sub>x</sub> and (b) PLLA-4ascPLA<sub>x</sub>.

**3. Relative crystallinity as a function of time for the (a) PDLA-scPLA<sub>x</sub>, (b) PDLA-4ascPLA<sub>x</sub>, (c) PLLA-scPLA<sub>x</sub>, and (d) PLLA-4ascPLA<sub>x</sub> samples during isothermal**

crystallization at 110°C.

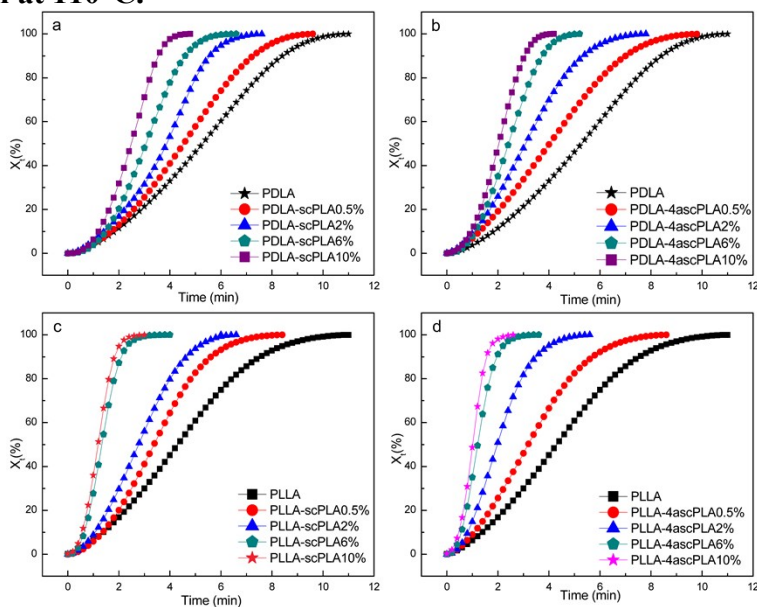

**Figure S3.** Relative crystallinity as a function of time for the (a) PDLA-scPLA<sub>x</sub>, (b) PDLA-4ascPLA<sub>x</sub>, (c) PLLA-scPLA<sub>x</sub>, and (d) PLLA-4ascPLA<sub>x</sub> samples during isothermal crystallization at 110°C.

**4. Relative crystallinity as a function of time for the (a) PDLA-scPLA10%, (b) PLLA-scPLA10%, (c) PDLA-4ascPLA10%, and (d) PLLA-4ascPLA10% samples during isothermal crystallization at various temperatures.**

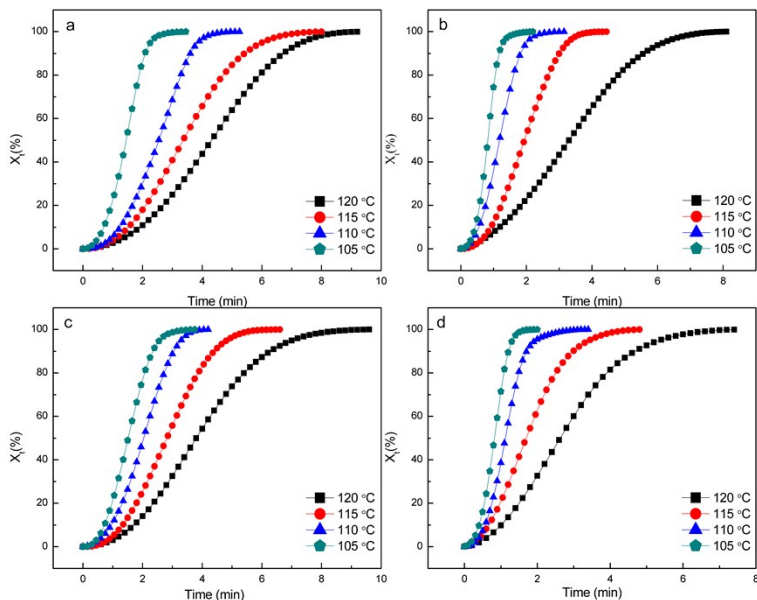

**Figure S4.** Relative crystallinity as a function of time for the (a) PDLA-scPLA10%,

(b) PLLA-scPLA10%, (c) PDLA-4ascPLA10%, and (d) PLLA-4ascPLA10% samples during isothermal crystallization at various temperatures.

### 5. Values of $t_{1/2}$ and crystallization kinetic parameters for PLA/NA samples with various nucleating agent contents at $T_{iso} = 110^{\circ}\text{C}$ .

**Table S1** Values of  $t_{1/2}$  and crystallization kinetic parameters for PLA/NA samples with various nucleating agent contents at a  $T_{iso} = 110^{\circ}\text{C}$ .

| Sample           | $x = 0\%$         |      |       | $x = 0.5\%$       |      |       | $x = 2\%$         |      |       | $x = 6\%$         |      |       | $x = 10\%$        |      |       |
|------------------|-------------------|------|-------|-------------------|------|-------|-------------------|------|-------|-------------------|------|-------|-------------------|------|-------|
|                  | $t_{1/2}/$<br>min | $n$  | $k$   |
| PDLA-scPLA $x$   | 5.27              | 2.05 | 0.024 | 4.47              | 2.18 | 0.027 | 3.76              | 2.43 | 0.028 | 3.04              | 2.72 | 0.033 | 2.29              | 2.83 | 0.055 |
| PDLA-4ascPLA $x$ | 5.27              | 2.05 | 0.024 | 3.97              | 1.84 | 0.055 | 3.21              | 2.02 | 0.073 | 2.42              | 2.53 | 0.075 | 2.07              | 2.74 | 0.101 |
| PLLA-scPLA $x$   | 4.32              | 2.09 | 0.033 | 3.35              | 2.25 | 0.046 | 2.66              | 2.13 | 0.081 | 1.38              | 2.65 | 0.326 | 1.18              | 2.66 | 0.450 |
| PLLA-4ascPLA $x$ | 4.32              | 2.09 | 0.033 | 3.15              | 1.92 | 0.077 | 2.12              | 2.16 | 0.160 | 1.21              | 2.53 | 0.432 | 1.01              | 2.66 | 0.690 |

### 6. Values of $t_{1/2}$ and crystallization kinetic parameters for PLA-NA10% samples at various $T_{iso}$ values.

**Table S2** Values of  $t_{1/2}$  and crystallization kinetic parameters for PLA-NA10% samples at various  $T_{iso}$  values.

| Sample          | 120°C             |      |       | 115°C             |      |       | 110°C             |      |       | 105°C             |      |       |
|-----------------|-------------------|------|-------|-------------------|------|-------|-------------------|------|-------|-------------------|------|-------|
|                 | $t_{1/2}/$<br>min | $n$  | $k$   |
| PDLA-scPLA10%   | 4.28              | 2.50 | 0.018 | 3.36              | 2.45 | 0.036 | 2.29              | 2.83 | 0.055 | 1.43              | 2.90 | 0.247 |
| PDLA-4ascPLA10% | 3.80              | 2.39 | 0.028 | 2.82              | 2.57 | 0.049 | 2.07              | 2.74 | 0.101 | 1.50              | 2.64 | 0.233 |
| PLLA-scPLA10%   | 3.26              | 2.06 | 0.061 | 1.93              | 2.54 | 0.130 | 1.18              | 2.66 | 0.450 | 0.82              | 3.35 | 1.353 |
| PLLA-4ascPLA10% | 2.83              | 2.08 | 0.094 | 1.69              | 2.11 | 0.230 | 1.01              | 2.66 | 0.690 | 0.83              | 2.98 | 1.252 |

**7. POM images obtained during the isothermal crystallization of (a) PLLA-scPLA6% and (b) PLLA-4ascPLA6% at various temperatures.**

Similar to the previous measurements, the PLLA-NA6% samples were first melted at 200°C for 5 min to remove the thermal history and then rapidly cooled to the desired temperature ( $T_{iso} = 155^\circ\text{C}$ , 150°C, 145°C, or 140°C) for isothermal crystallization.

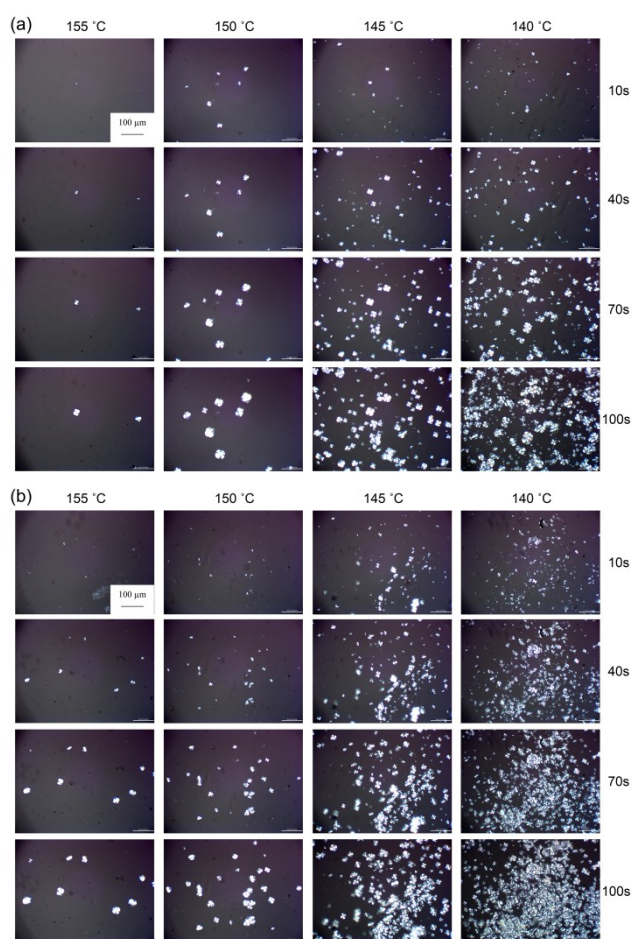

**Figure S5.** POM images obtained during the isothermal crystallization of (a) PLLA-scPLA6% and (b) PLLA-4ascPLA6% at various temperatures.
